# Supplementary material
Source: publisher site journal article supplement (http://static.cambridge.org/content/id/urn:cambridge.org:id:article:S0899823X19000886/resource/name/S0899823X19000886supp001.docx)
Supplement: Supplementary file 1 [file S0899823X19000886supp001.docx]

**Appendix 1: Antibiotic Risk Classes***

| **Low Risk** | **Medium Risk** | **High Risk** | |
| --- | --- | --- | --- |
| Cefadroxil | Trimethoprim/Sulfamethoxazole | Aztreonam | |
| Cefazolin | Trimethoprim | Clindamycin | |
| Metronidazole (intravenous only) | Amoxicillin/clavulanate | Ertapenem | |
| Fosfomycin | Amoxicillin | Meropenem | |
| Gentamicin | Ampicillin | Imipenem | |
| Nitrofurantoin | Ampicillin/sulbactam | Cefixime | |
| Telavancin | Dicloxacillin | Cefotaxime | |
| Tobramycin | Nafcillin | Cefotetan | |
| Vancomycin (intravenous only) | Oxacillin | Cefoxitin | |
| Amikacin | Penicillin | Cefpodoxime | |
| Cephalexin | Piperacillin | Cefuroxime | |
| Daptomycin | Piperacillin-tazobactam | Cefepime | |
| Doxycycline | Ticarcillin/clavulanate | Ceftaroline | |
| Linezolid | Azithromycin | Ceftazidime | |
| Minocycline | Clarithromycin | Ceftriaxone | |
| Quinupristin/dalfopristin | Erythromycin | Ceftolozane/tazobactam | |
| Rifampin |  | Ceftazidime/avibactam | |
| Tigecycline |  | Ciprofloxacin | |
|  |  | Moxifloxacin | |
|  |  | Levofloxacin | |
|  |  | Norfloxacin | |
|  |  | Ofloxacin | |
|  |  | Gatifloxacin | |
|  |  |  | |
| **Both oral and parenteral forms included where applicable, except as indicated* | | |
| Categories based on meta-analyses by Bignardi11 and Brown.16 | |  | |
|  |  |  | |
